# Supplementary material for: Revealing the combined effects of lactulose and probiotic enterococci on the swine faecal microbiota using 454 pyrosequencing
Source: PubMed Central journal article supplement (PMC4919990; doi:10.1111/1751-7915.12370), 2016-06-16
Supplement: MBT2-9-486-s001.pdf [file MBT2-9-486-s001.pdf]

### Supporting information

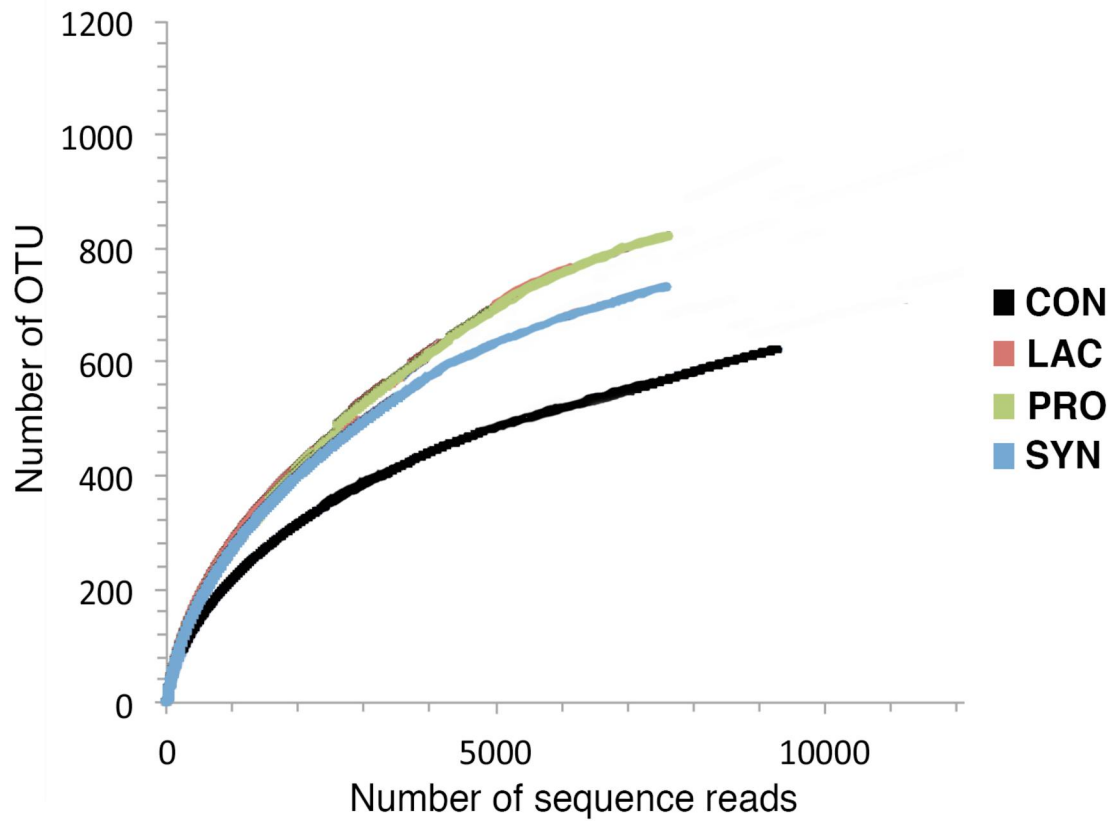

**Fig. S1.** Rarefaction curves of pooled pig samples with an OTU definition at 97% identity level created by using CD-HIT in Mothur. Coloured lines depict each control (CON), prebiotic lactulose (LAC), probiotic *Enterococcus faecium* NCIMB 11181 (PRO), synbiotic (SYN) groups.

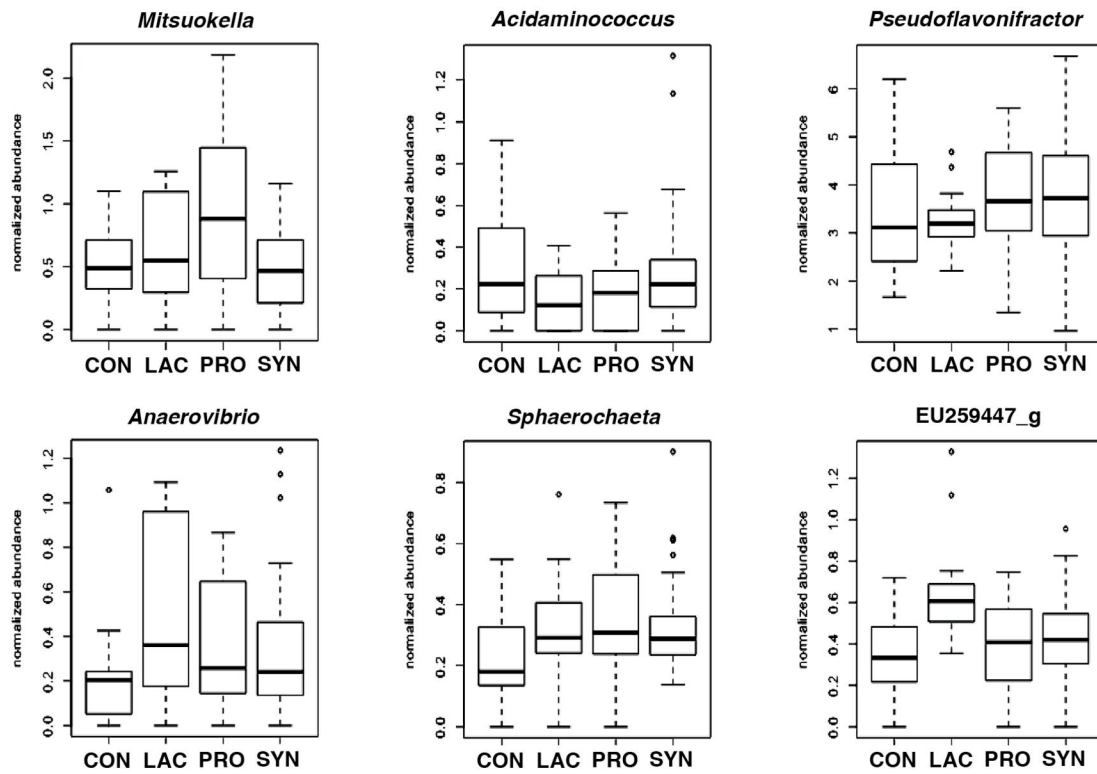

**Fig. S2.** Boxplot of the normalised abundance of discriminating bacterial genera and OTU according to linear discriminant analysis (loadingplot).

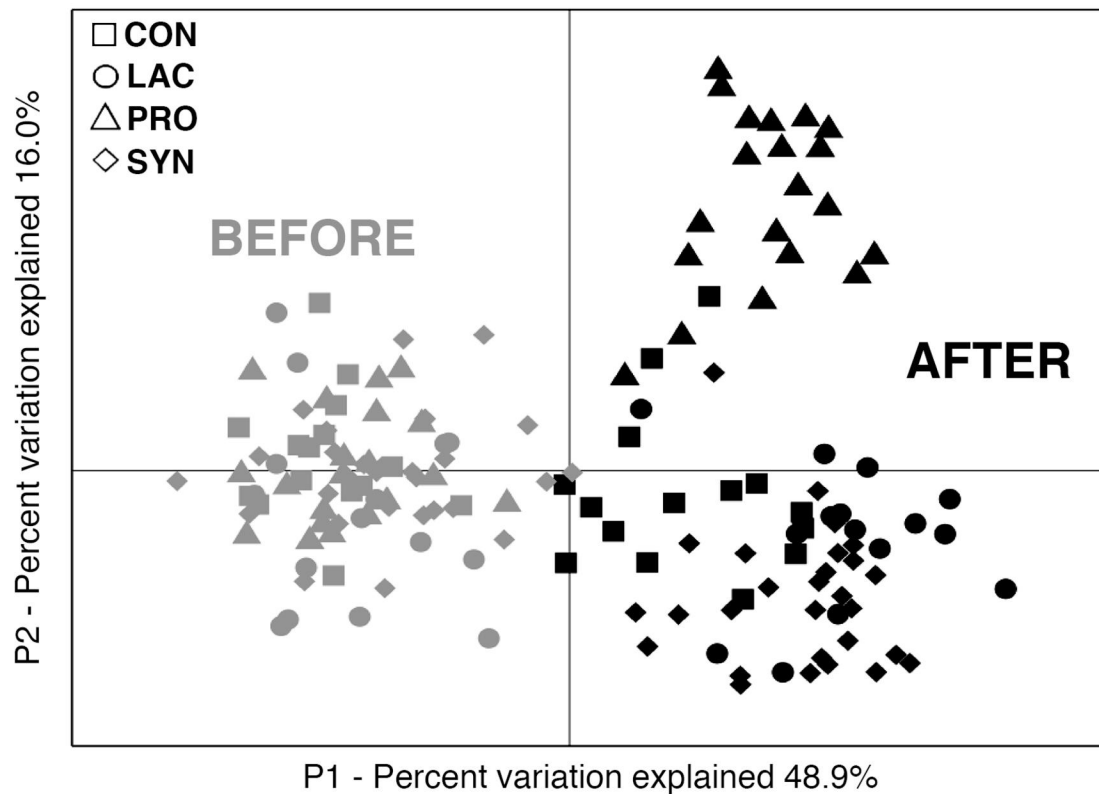

**Fig. S3.** Clustering of the faecal microbiota of the weaned piglets before (grey) and after (black) the treatment. The DAPC plot was created using the 33 differentially abundant bacterial genera as variables. All pig samples ( $n = 79$ ) belonging to control (CON), prebiotic lactulose (LAC), probiotic *E. faecium* NCIMB 11181 (PRO) and synbiotic (SYN) groups are depicted as symbols (square, circle, triangle and diamond), respectively.

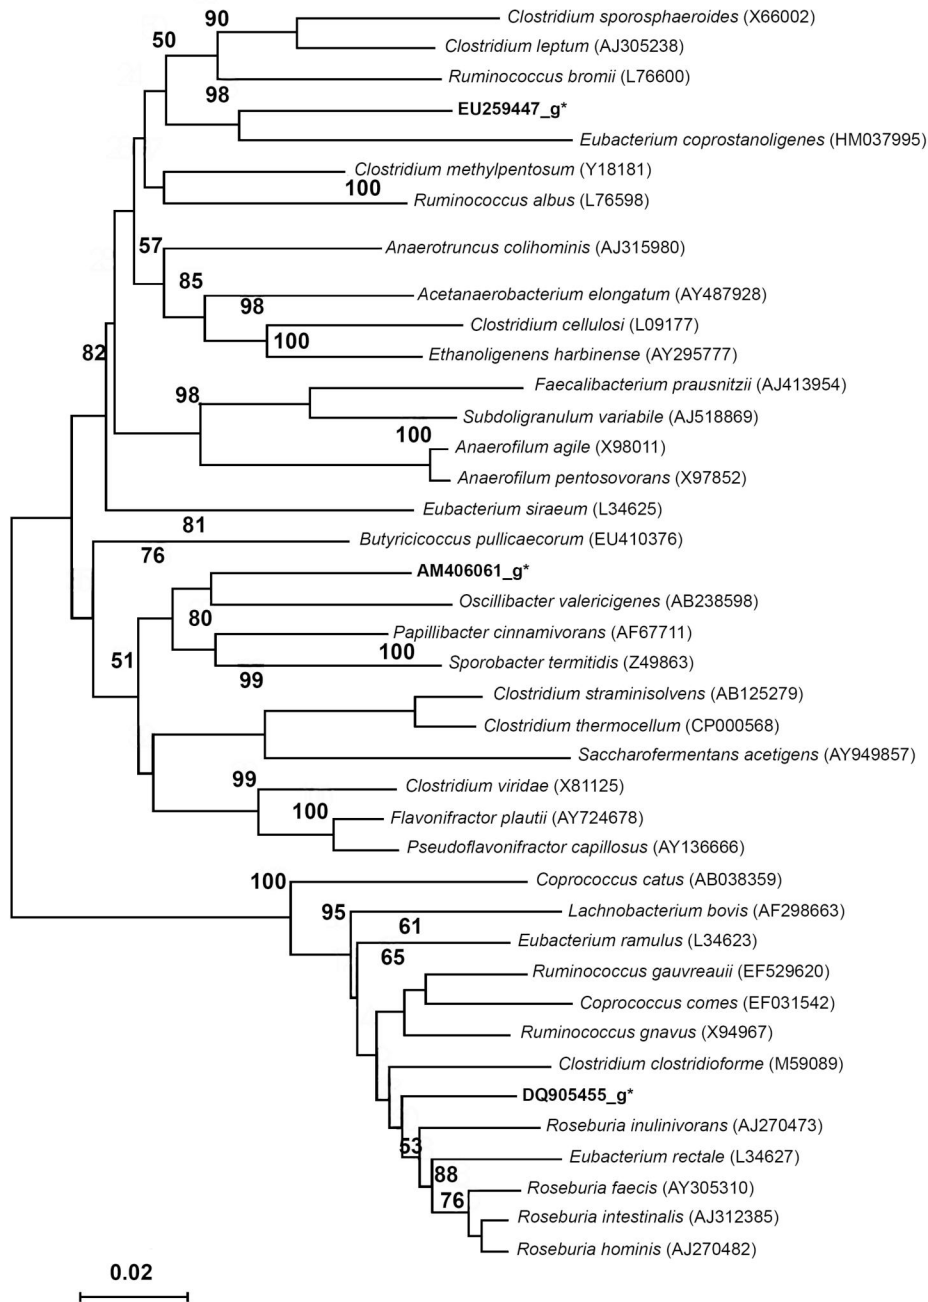

**Fig. S4.** Neighbour-joining phylogenetic tree showing the relationships of several bacterial strains related to three uncultured bacterial clones (denoted with asterisks). The number adjacent to each node indicates the percentage of trees having this particular configuration during 1000 bootstrap trials. The scale bar represents fixed nucleotide substitutions per sequence position. The GenBank accession numbers of the nucleotide sequences used in this analysis are provided in parentheses.

**Table S1.** Summary of sequence reads after quality control and microbial diversity of each group of pigs.

|                                  | <b>CON (n = 15)</b>     | <b>LAC (n = 15)</b>     | <b>PRO (n = 20)</b>     | <b>SYN (n = 29)</b>     |
|----------------------------------|-------------------------|-------------------------|-------------------------|-------------------------|
| <b>Total number of reads</b>     | 80,251                  | 100,172                 | 98,156                  | 208,660                 |
| <b>Number of OTU<sup>a</sup></b> | 669                     | 735                     | 853                     | 897                     |
| <b>Chao1<sup>a</sup></b>         | 810                     | 1472                    | 1376                    | 1335                    |
| <b>ACE<sup>a</sup></b>           | 1067                    | 1992                    | 1744                    | 1740                    |
| <b>Shannon<sup>a</sup></b>       | 4.51<br>(4.02, 5.15)    | 5.06<br>(4.24, 5.57)    | 5.21<br>(4.09, 5.68)    | 5.23<br>(3.74, 5.73)    |
| <b>Simpson (1-D)<sup>a</sup></b> | 0.958<br>(0.890, 0.985) | 0.977<br>(0.958, 0.989) | 0.980<br>(0.922, 0.990) | 0.979<br>(0.893, 0.991) |

OTU, operational taxonomic units, ACE – abundance-based coverage estimator.

<sup>a</sup>Calculations were generated using CD-HIT with an OTU definition between 97% and 100% identity cut-off. The median values represent non-parametric statistical measurements. All parentheses depict the range of values from lowest to highest in each group.

**Table S2.** Mean values of the relative abundances (% of total sequences) of selected bacterial phyla and families between CON, LAC, PRO, SYN groups.

| <b>Bacterial taxa<sup>a</sup></b>        | <b>CON</b><br><b>(n = 15)</b> | <b>LAC</b><br><b>(n = 15)</b> | <b>PRO</b><br><b>(n = 20)</b> | <b>SYN</b><br><b>(n = 29)</b> |
|------------------------------------------|-------------------------------|-------------------------------|-------------------------------|-------------------------------|
| <b>Phylum level<sup>b</sup></b>          |                               |                               |                               |                               |
| <i>Firmicutes</i>                        | 56.6                          | 71.0 <sup>+</sup>             | 63.1                          | 58.1 <sup>+</sup>             |
| <i>Bacteroidetes</i>                     | 29.4                          | 24.4 <sup>+</sup>             | 30.0                          | 34.3 <sup>+</sup>             |
| <i>Proteobacteria</i>                    | 10.4                          | 1.33                          | 3.01                          | 3.98                          |
| <i>Tenericutes</i>                       | 2.74                          | 2.33                          | 2.60                          | 2.23                          |
| Other phyla                              | 0.86                          | 0.94                          | 1.29                          | 1.39                          |
| <i>Firmicutes:Bacteroidetes</i><br>ratio | 2.47                          | 3.39 <sup>+</sup>             | 2.35                          | 1.99 <sup>+</sup>             |
| <b>Family level</b>                      |                               |                               |                               |                               |
| <i>Ruminococcaceae</i>                   | 28.4                          | 32.4                          | 31.0                          | 25.1                          |
| <i>Prevotellaceae</i>                    | 16.0                          | 12.5                          | 17.7                          | 18.9                          |
| <i>Enterobacteriaceae</i>                | 10.1                          | 0.99                          | 2.35                          | 3.57                          |
| <i>Veillonellaceae</i>                   | 8.87                          | 6.31                          | 6.00                          | 4.75                          |
| <i>Lactobacillaceae</i>                  | 5.67                          | 9.20                          | 7.97                          | 13.8                          |
| <i>Lachnospiraceae</i>                   | 5.17                          | 7.07                          | 5.78                          | 6.26                          |
| Other families                           | 25.79                         | 31.53                         | 29.2                          | 27.62                         |

<sup>a</sup> Mean relative abundance were calculated

<sup>b</sup> One-way Analysis of Variance (ANOVA) test of significance was performed to assess the difference in the percent abundance values among pig groups. A subsequent TukeyHSD post-hoc analysis was performed to check which two independent groups are significantly different. *P*-values < 0.05 are marked (†)

**Table S3.** Composition of the basal (feed) diet (as-fed basis)<sup>3</sup>

| <b>Composition</b>                    | <b>Value</b> |
|---------------------------------------|--------------|
| <b>Ingredients (g/kg)</b>             |              |
| Corn                                  | 553.8        |
| Soybean meal                          | 334.3        |
| Molasses                              | 25.0         |
| Animal Fat                            | 53.3         |
| Difluorinated phosphate               | 19.3         |
| Limestone                             | 7.8          |
| L-lysine HCl                          | 1.7          |
| Trace mineral premix <sup>1</sup>     | 1.0          |
| Vitamin premix <sup>2</sup>           | 1.2          |
| Salt                                  | 2.0          |
| DL-methionine                         | 0.3          |
| Choline chloride                      | 0.3          |
| <b>Chemical composition (kcal/kg)</b> |              |
| ME (kcal/kg)                          | 3,360        |
| Crude protein (%)                     | 20.00        |
| Lysine (%)                            | 1.30         |
| Calcium (%)                           | 0.90         |
| Phosphorus (%)                        | 0.76         |
| <b>Analysed composition</b>           |              |
| GE (kcal/kg)                          | 4,112        |
| Crude protein (%)                     | 19.65        |
| Calcium (%)                           | 0.87         |
| Phosphorus (%)                        | 0.76         |

<sup>1</sup> Provided per kg of complete diet: 12.5 mg Mn, 179 mg Zn, 140 mg Cu, 0.5 mg I and 0.4 mg Se.

<sup>2</sup> Provided per kg of complete diet: 20,000 IU of vitamin A; 4,000 IU of vitamin D3; 80 IU of vitamin E; 16 mg of vitamin K3; 4 mg of thiamine, 20 mg of riboflavin; 6 mg of pyridoxine; 0.08 mg of vitamin B12; 120 mg of niacin; 50 mg of Ca-pantothenate; 2mg of folic acid and 0.08 mg of biotin.

<sup>3</sup> The additive was included in the diets by replacing the same amount of corn.

**Table S4.** Summary of the 16S rRNA gene pyrosequencing reads from each pig sample after the administration of prebiotic lactulose (LAC), probiotic *Enterococcus faecium* NCIMB 11181 (PRO) and synbiotic mixture (SYN).

| <b>Pig (Group)</b> | <b>Valid reads</b> | <b>Pig (Group)</b> | <b>Valid reads</b> | <b>Pig (Group)</b> | <b>Valid reads</b> | <b>Pig (Group)</b> | <b>Valid reads</b> |
|--------------------|--------------------|--------------------|--------------------|--------------------|--------------------|--------------------|--------------------|
| C-1 (CON)          | 4994               | L-1 (LAC)          | 2312               | P-1 (PRO)          | 3730               | S-1 (SYN)          | 3541               |
| C-2 (CON)          | 3722               | L-2 (LAC)          | 1584               | P-2 (PRO)          | 2833               | S-2 (SYN)          | 4916               |
| C-3 (CON)          | 3086               | L-3 (LAC)          | 2593               | P-3 (PRO)          | 6562               | S-3 (SYN)          | 8915               |
| C-4 (CON)          | 5530               | L-4 (LAC)          | 15793              | P-4 (PRO)          | 9272               | S-4 (SYN)          | 8595               |
| C-5 (CON)          | 5982               | L-5 (LAC)          | 4313               | P-5 (PRO)          | 2445               | S-5 (SYN)          | 6019               |
| C-6 (CON)          | 2319               | L-6 (LAC)          | 6225               | P-6 (PRO)          | 7941               | S-6 (SYN)          | 14385              |
| C-7 (CON)          | 2509               | L-7 (LAC)          | 6717               | P-7 (PRO)          | 5189               | S-7 (SYN)          | 13215              |
| C-8 (CON)          | 9296               | L-8 (LAC)          | 4960               | P-8 (PRO)          | 4694               | S-8 (SYN)          | 11174              |
| C-9 (CON)          | 4317               | L-9 (LAC)          | 7483               | P-9 (PRO)          | 5102               | S-9 (SYN)          | 9440               |
| C-10 (CON)         | 4790               | L-10 (LAC)         | 9210               | P-10 (PRO)         | 5068               | S-10 (SYN)         | 8093               |
| C-11 (CON)         | 5384               | L-11 (LAC)         | 9636               | P-11 (PRO)         | 3581               | S-11 (SYN)         | 4553               |
| C-12 (CON)         | 3305               | L-12 (LAC)         | 7132               | P-12 (PRO)         | 4988               | S-12 (SYN)         | 5096               |
| C-13 (CON)         | 5567               | L-13 (LAC)         | 7401               | P-13 (PRO)         | 2752               | S-13 (SYN)         | 5364               |
| C-14 (CON)         | 9500               | L-14 (LAC)         | 7070               | P-14 (PRO)         | 4206               | S-14 (SYN)         | 5124               |
| C-15 (CON)         | 9950               | L-15 (LAC)         | 7743               | P-15 (PRO)         | 3347               | S-15 (SYN)         | 6783               |
|                    |                    |                    |                    | P-16 (PRO)         | 4490               | S-16 (SYN)         | 6005               |
|                    |                    |                    |                    | P-17 (PRO)         | 5300               | S-17 (SYN)         | 5364               |
|                    |                    |                    |                    | P-18 (PRO)         | 6635               | S-18 (SYN)         | 4676               |
|                    |                    |                    |                    | P-19 (PRO)         | 5228               | S-19 (SYN)         | 4046               |
|                    |                    |                    |                    | P-20 (PRO)         | 4793               | S-20 (SYN)         | 6112               |
|                    |                    |                    |                    |                    |                    | S-21 (SYN)         | 5295               |
|                    |                    |                    |                    |                    |                    | S-22 (SYN)         | 7587               |
|                    |                    |                    |                    |                    |                    | S-23 (SYN)         | 6928               |
|                    |                    |                    |                    |                    |                    | S-24 (SYN)         | 6972               |
|                    |                    |                    |                    |                    |                    | S-25 (SYN)         | 6371               |
|                    |                    |                    |                    |                    |                    | S-26 (SYN)         | 3652               |
|                    |                    |                    |                    |                    |                    | S-27 (SYN)         | 5444               |
|                    |                    |                    |                    |                    |                    | S-28 (SYN)         | 3702               |
|                    |                    |                    |                    |                    |                    | S-29 (SYN)         | 21293              |
